# Supplementary material for: Autoantibodies linked to autoimmune diseases associate with COVID-19 outcomes
Source: bioRxiv or medRxiv preprint supplement (doi:10.1101/2022.02.17.22271057), 2022-02-17

Autoantibodies linked to autoimmune diseases associate with COVID-19 outcomes

Supplementary Figures 1-9

Supplementary Tables S1-S6 provided as Supplementary Data file

group  Control  Mild  Moderate  Severe

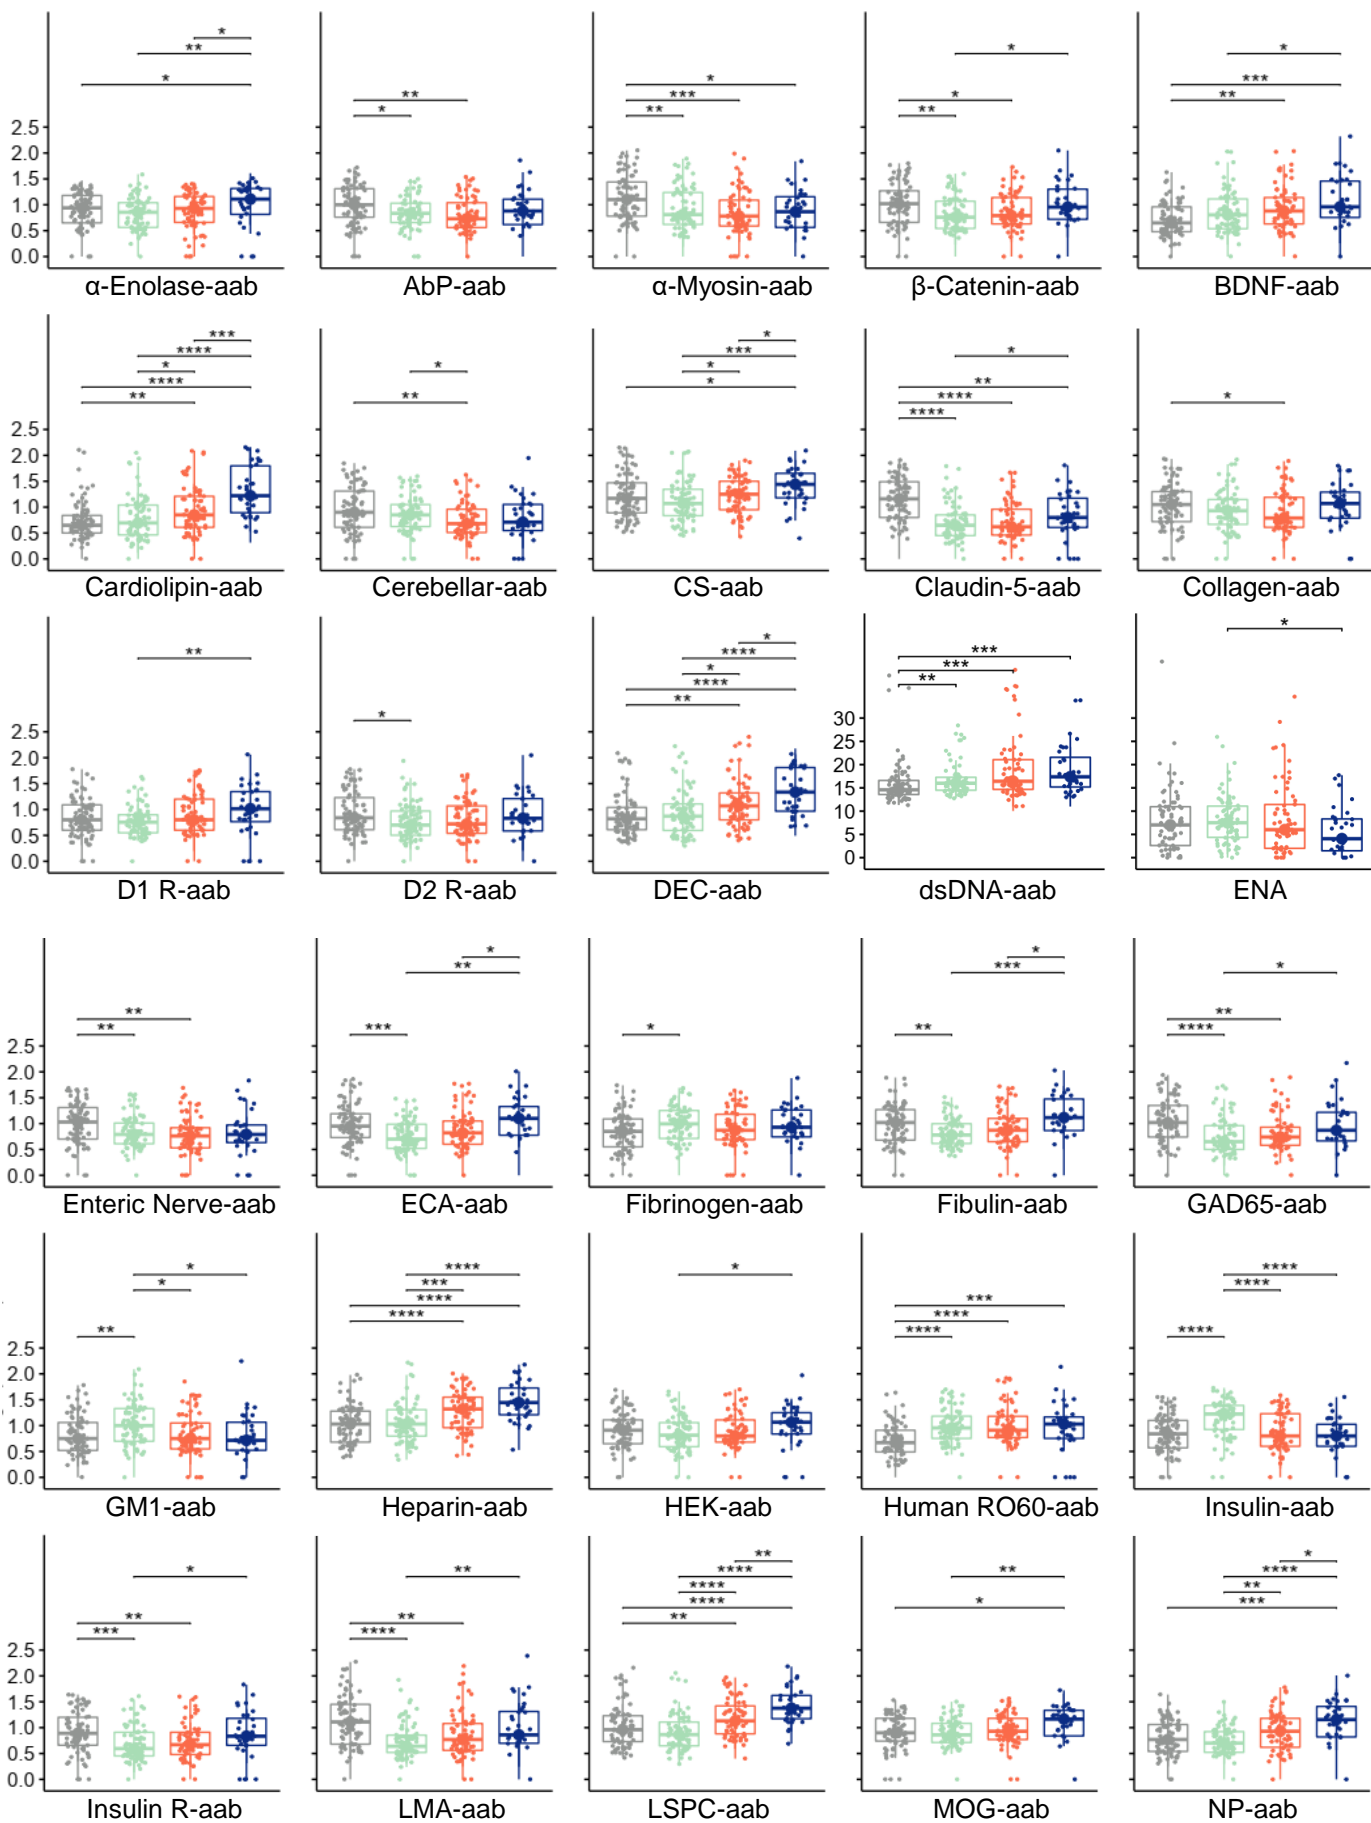

group  Control  Mild  Moderate  Severe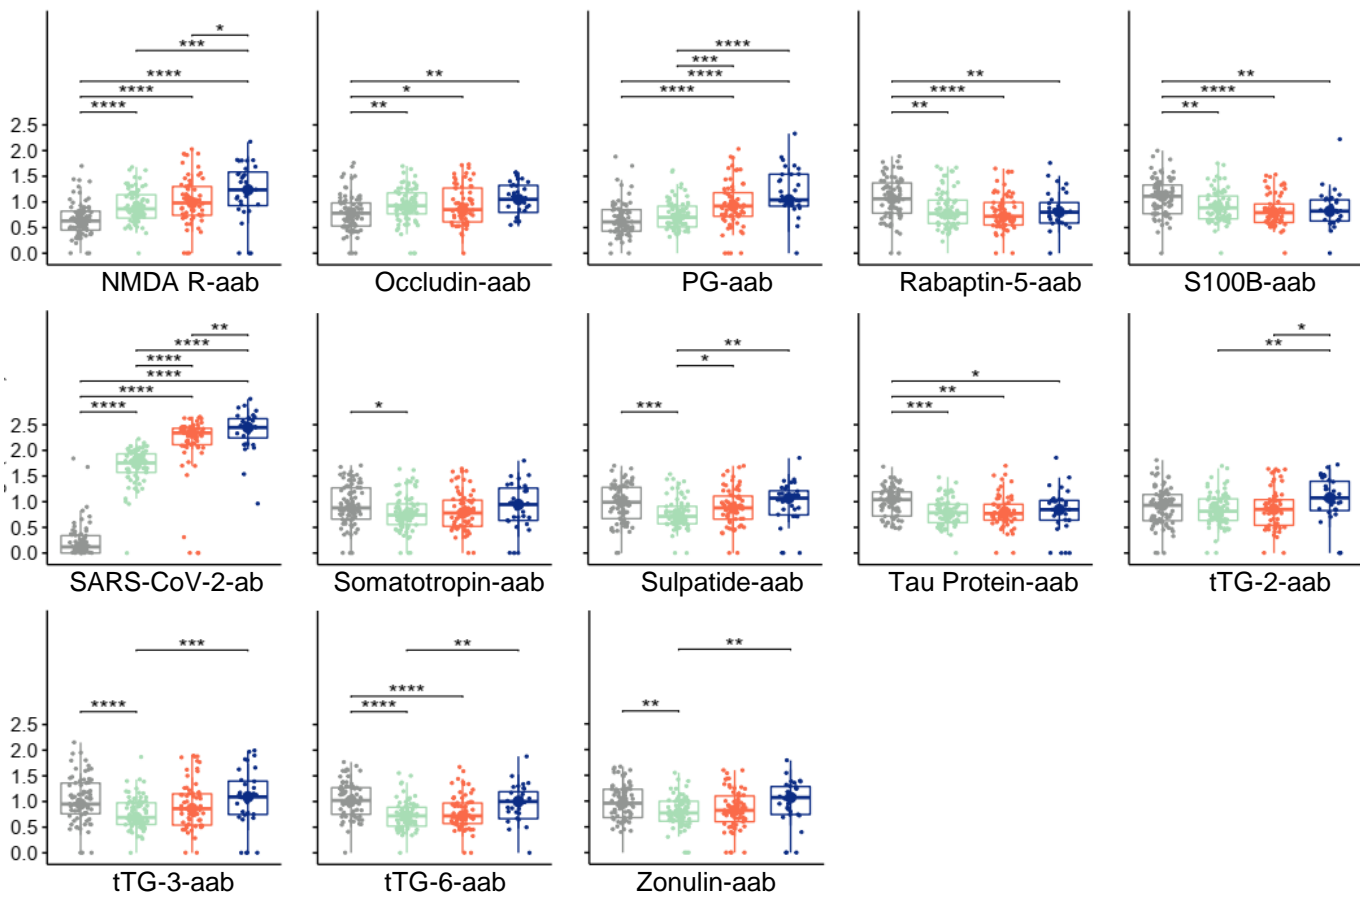

group  Control  Mild  Moderate  Severe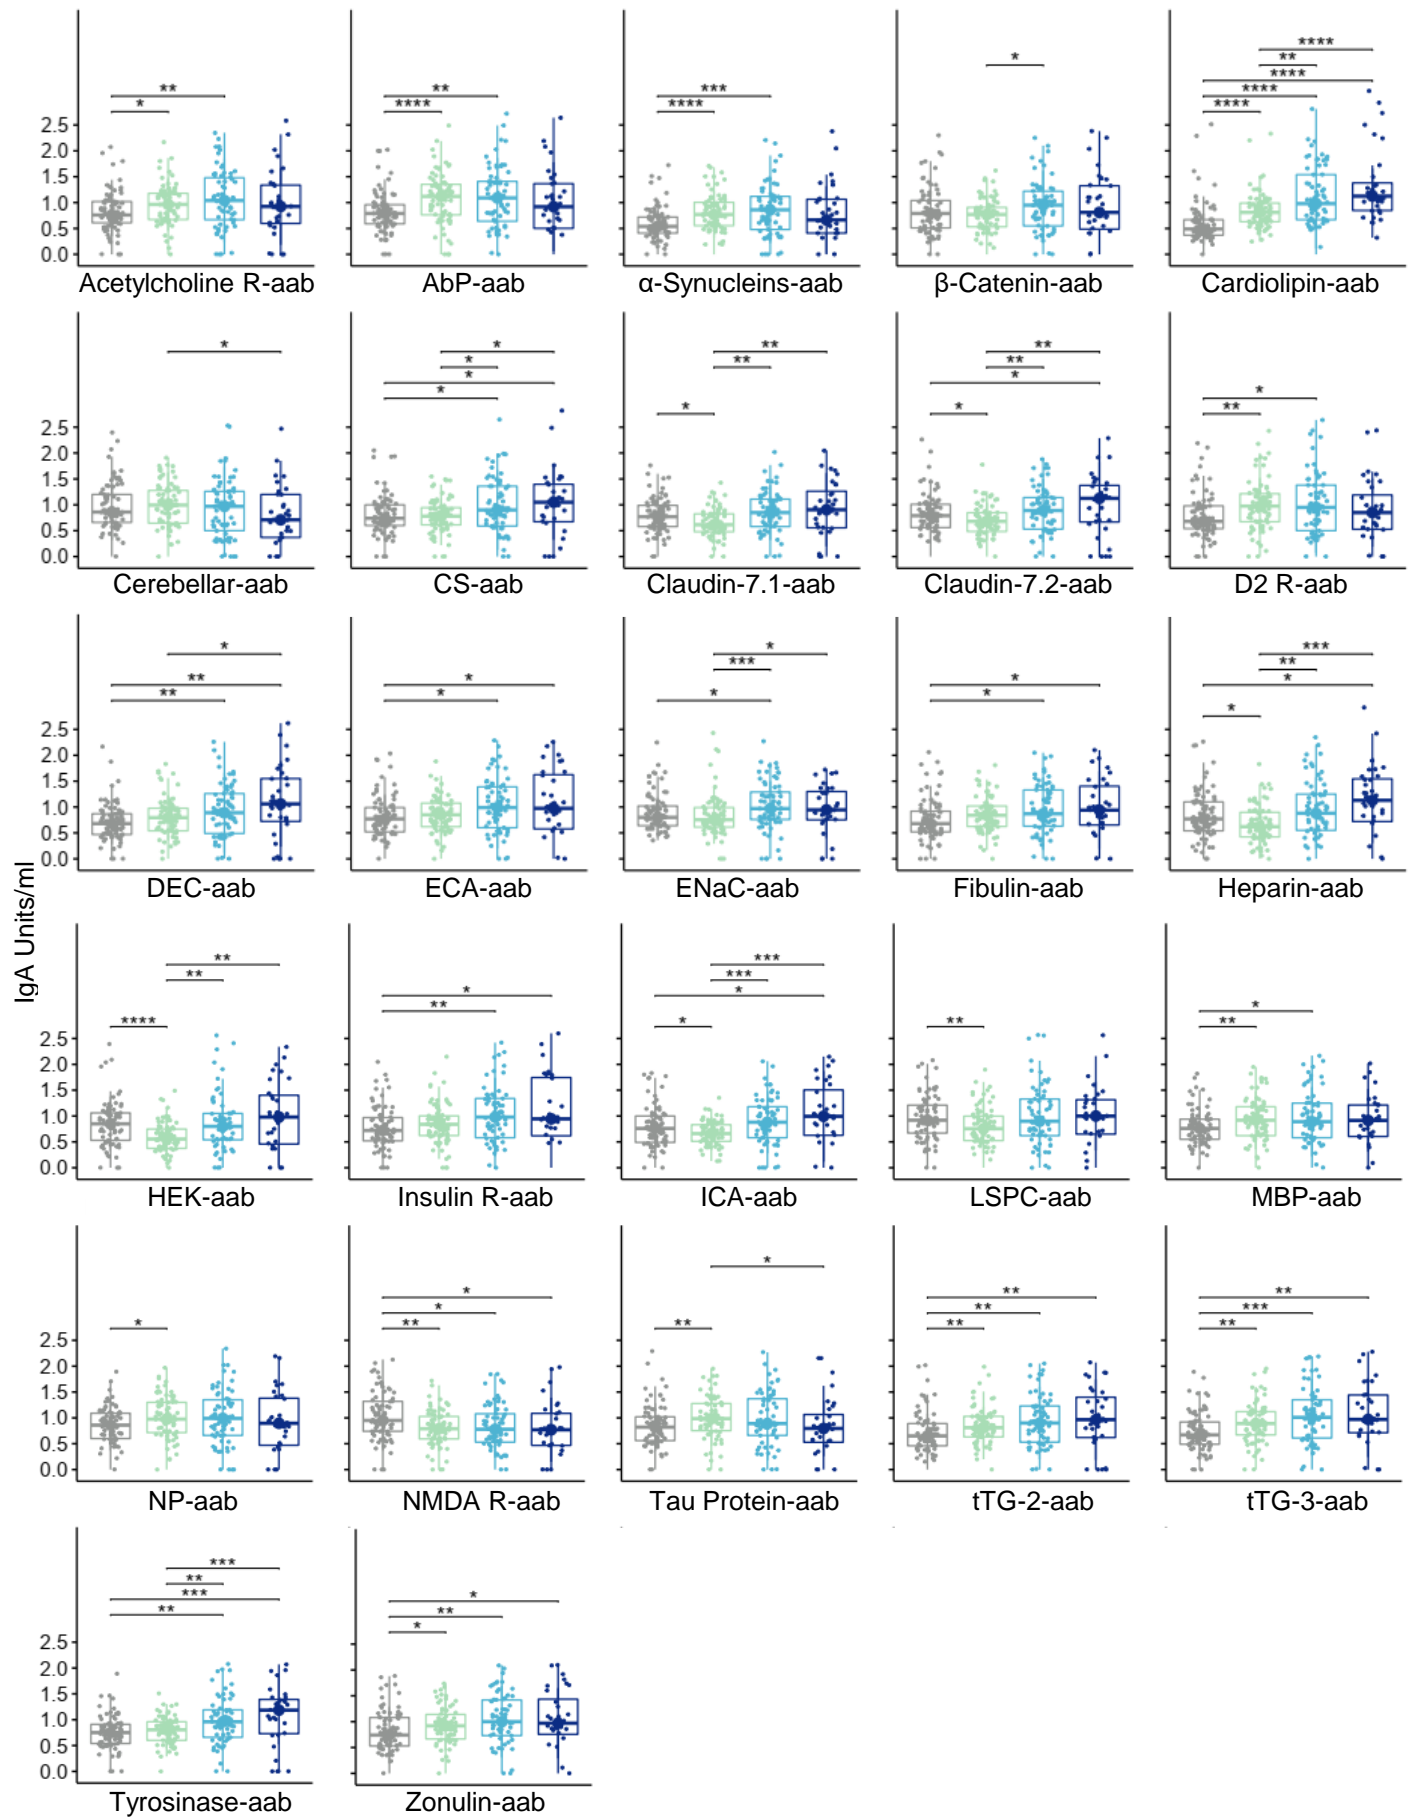

**a**

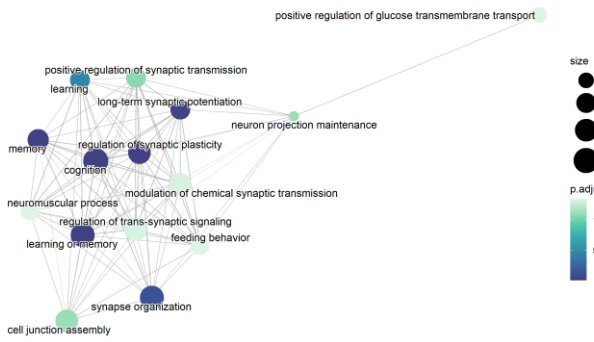

**b**

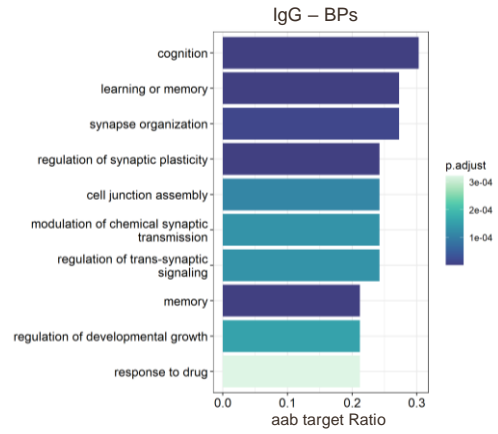

**c**

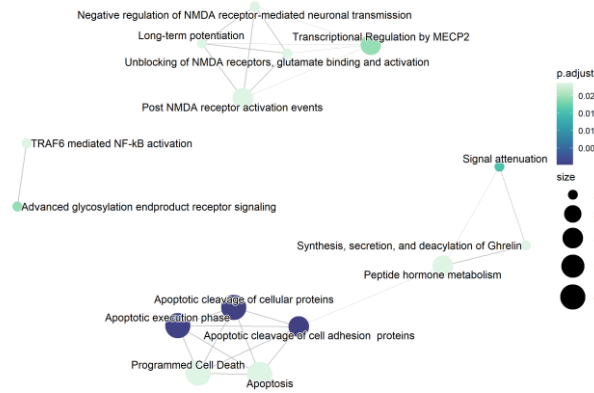

**d**

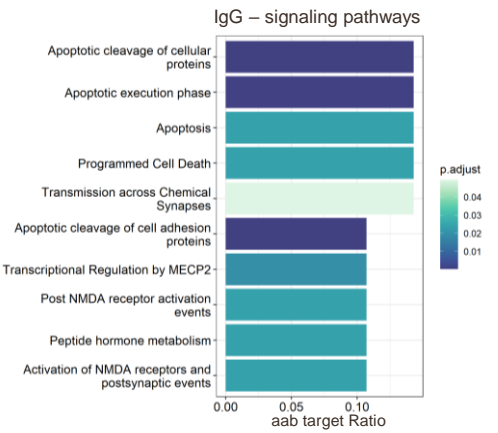

**e**

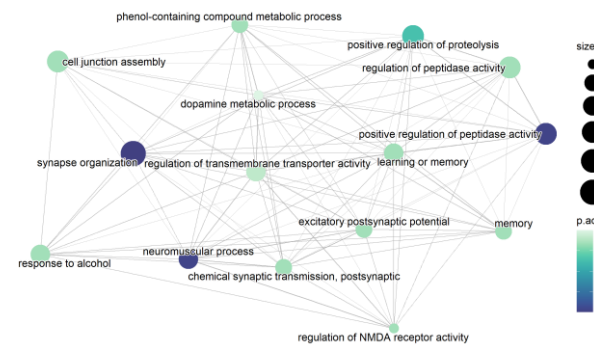

**f**

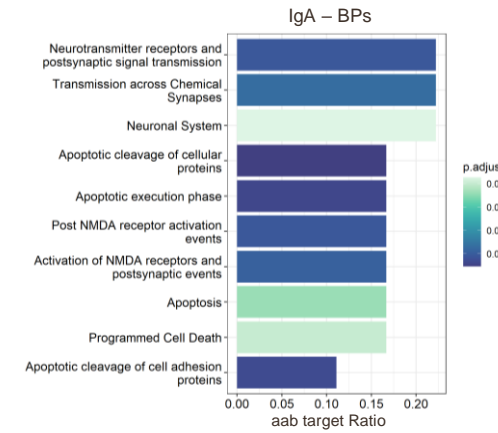

**g**

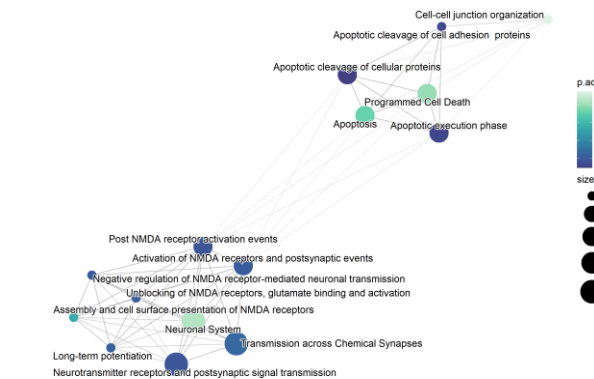

**h**

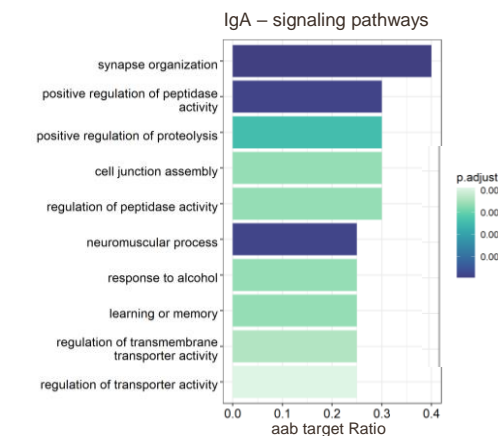

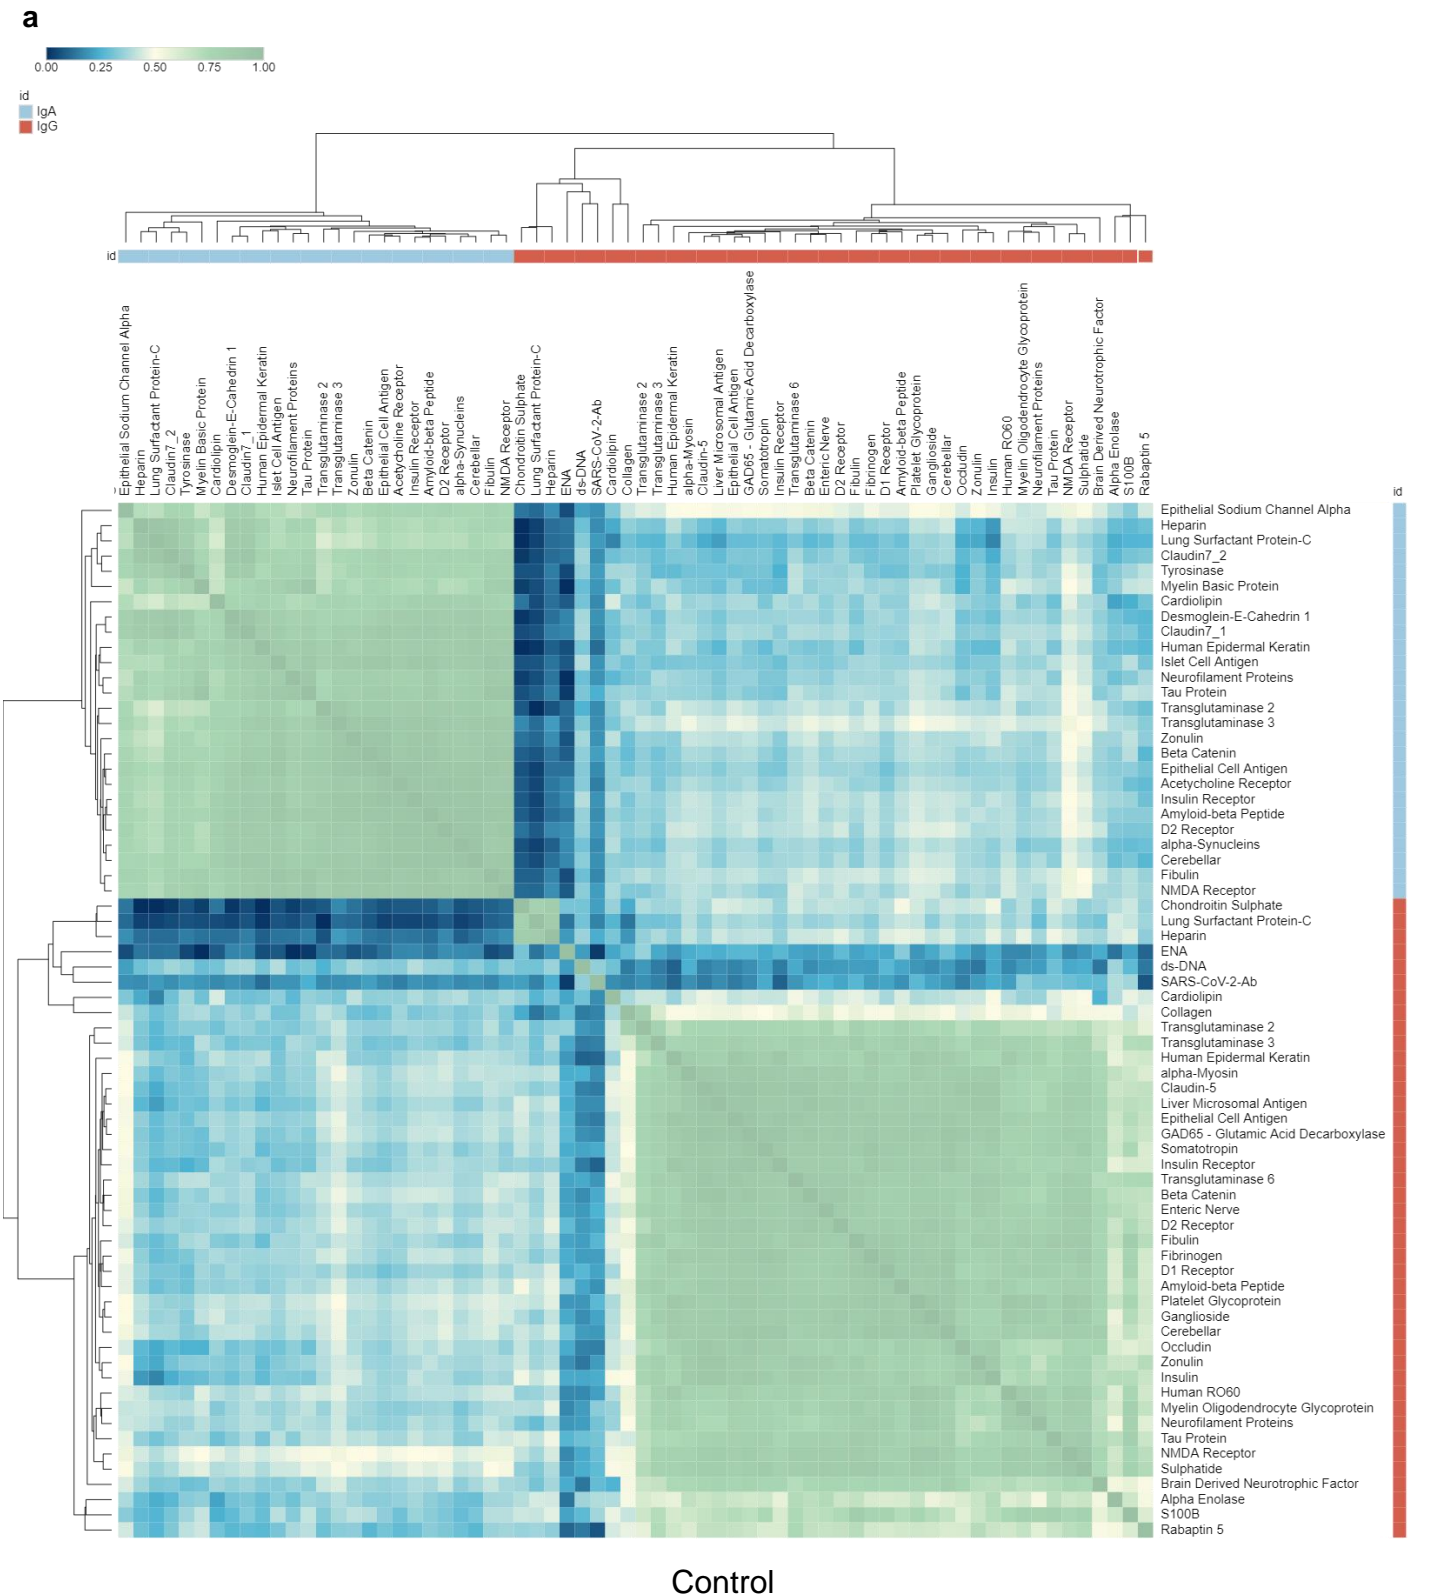

**b**

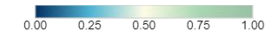

id  
IgA  
IgG

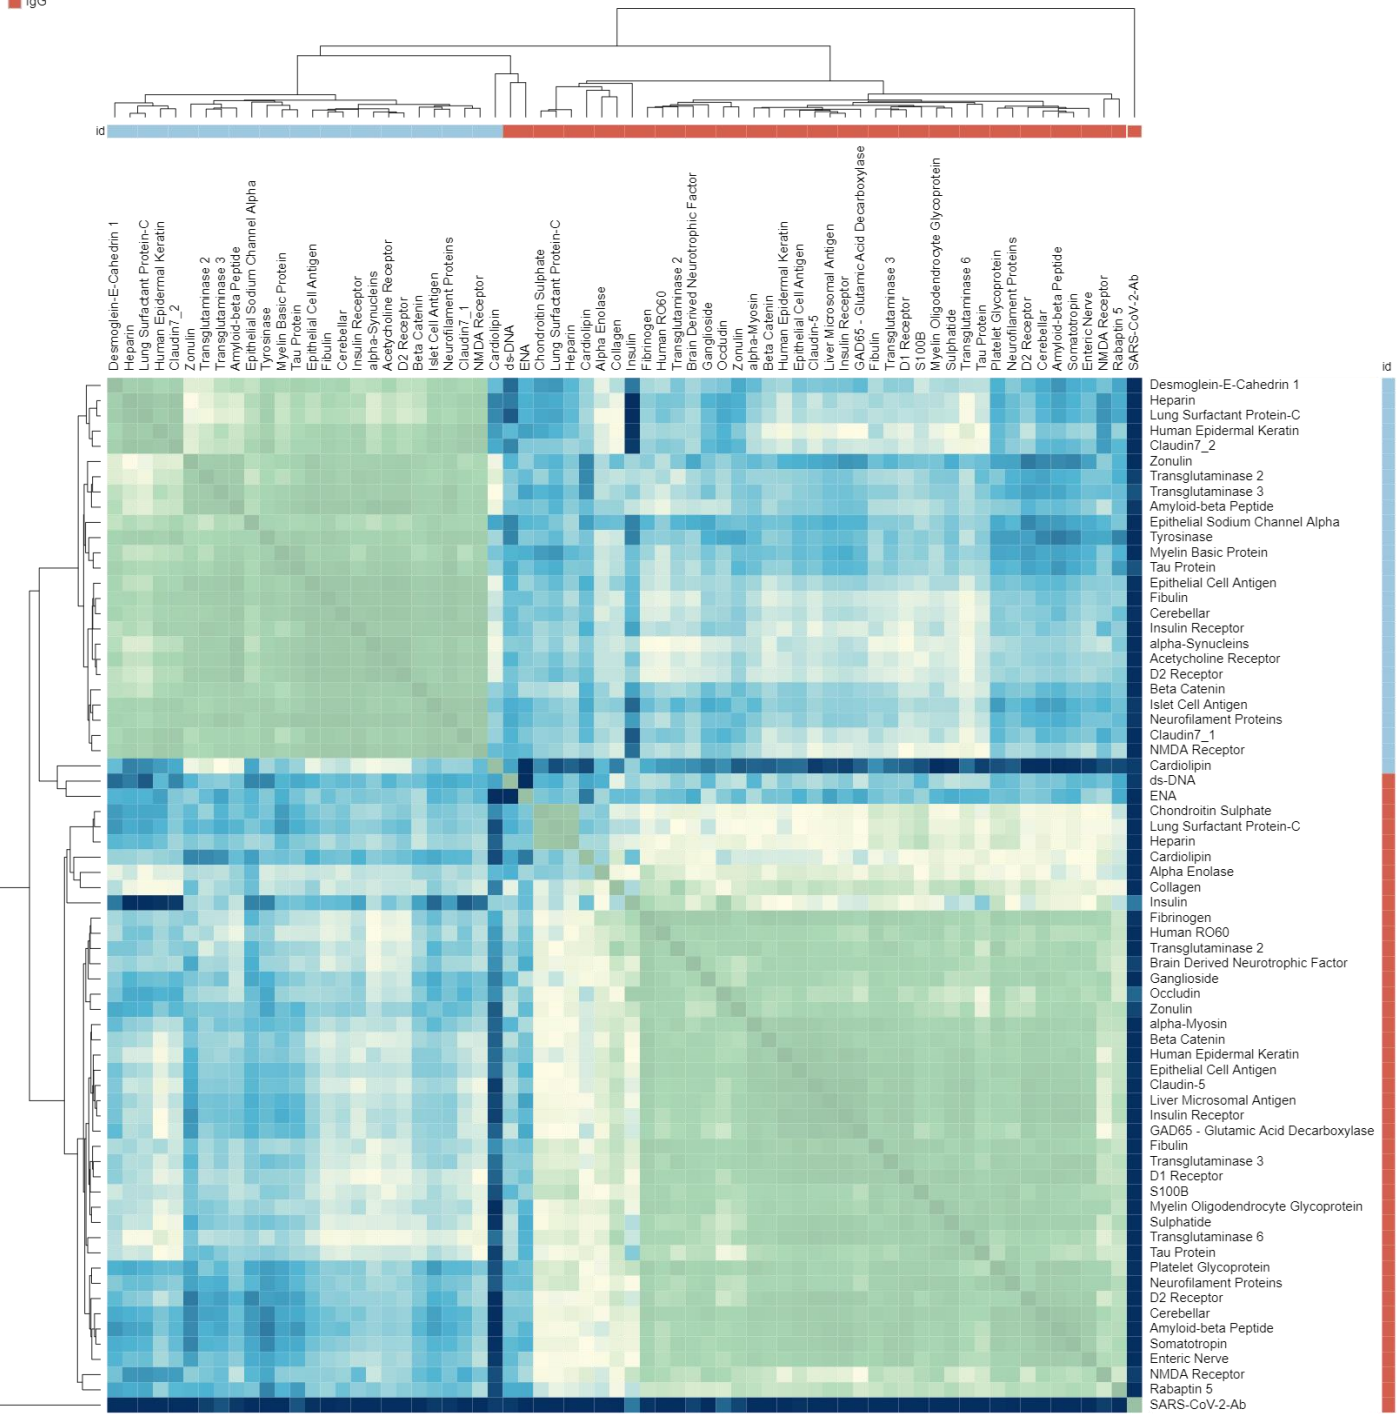

Mild COVID-19

C

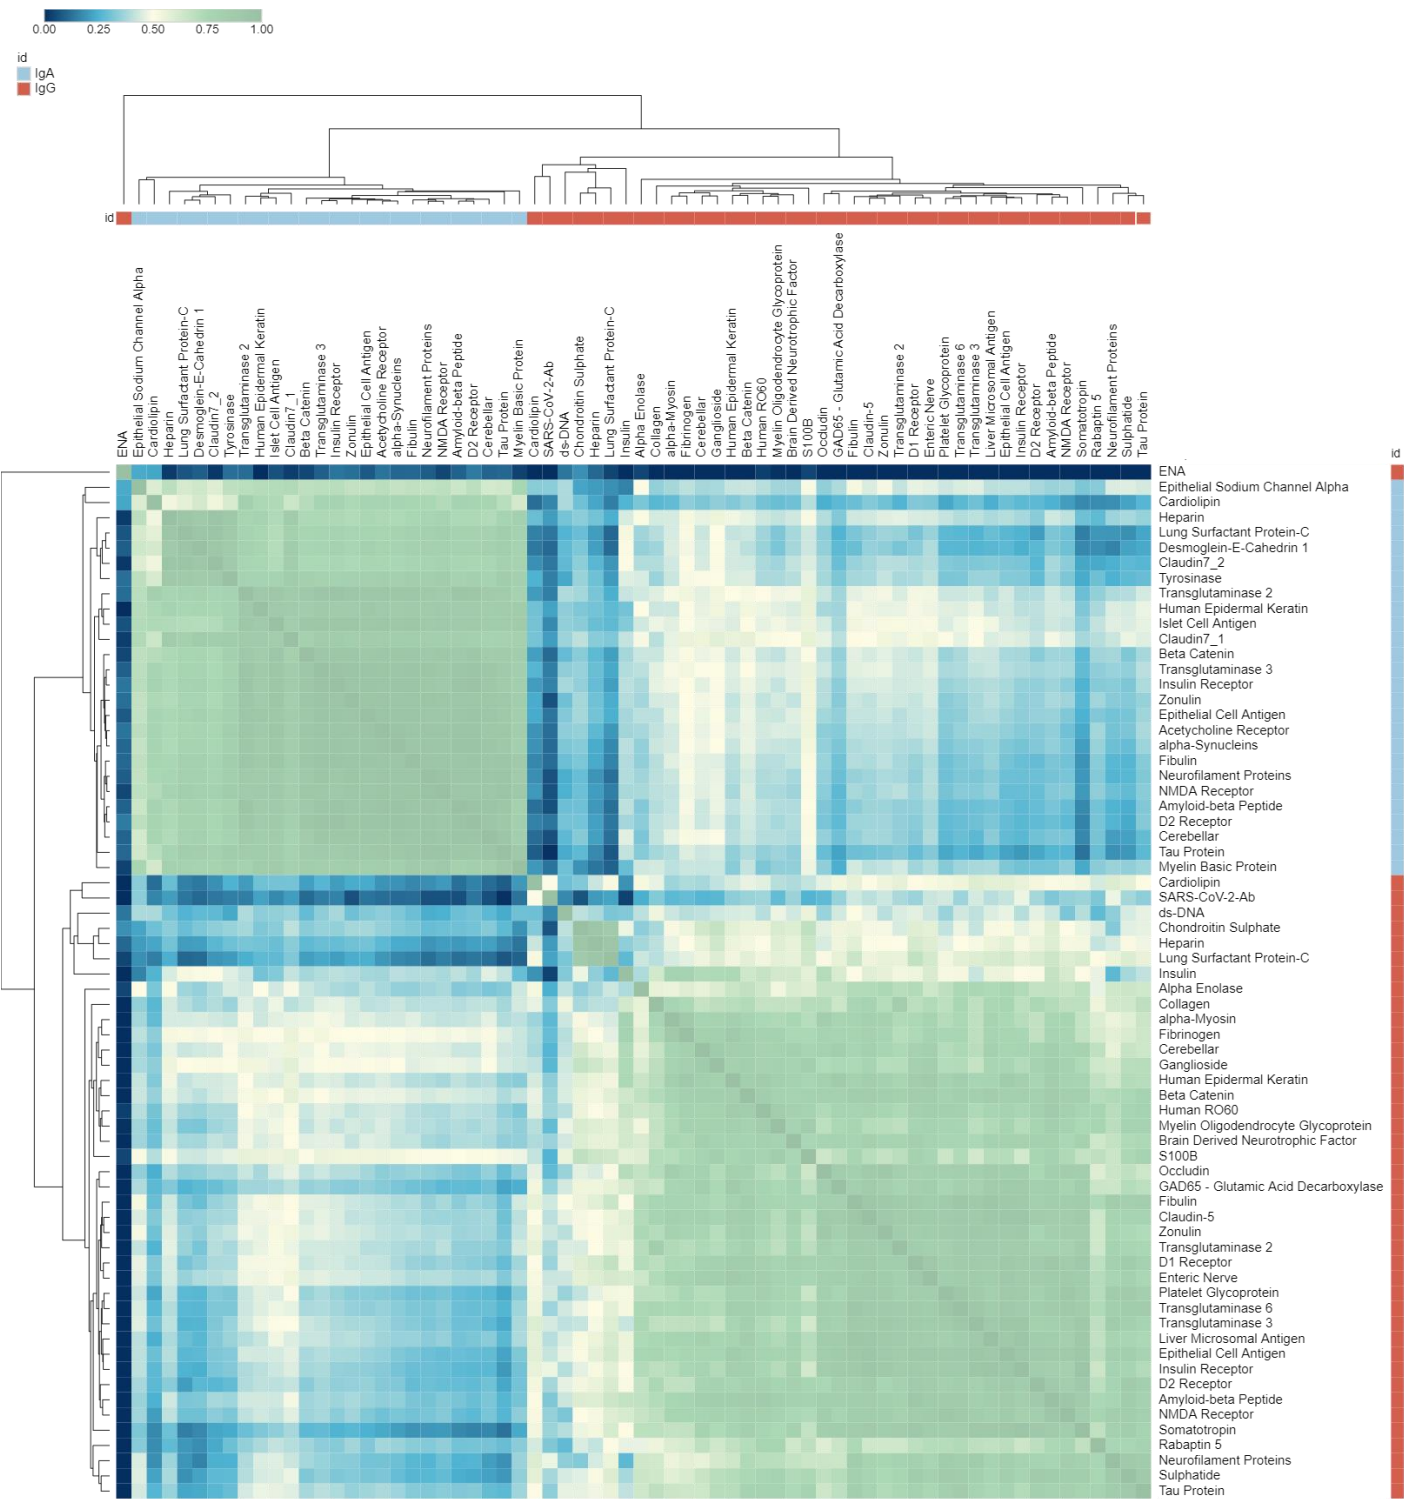

Moderate COVID-19



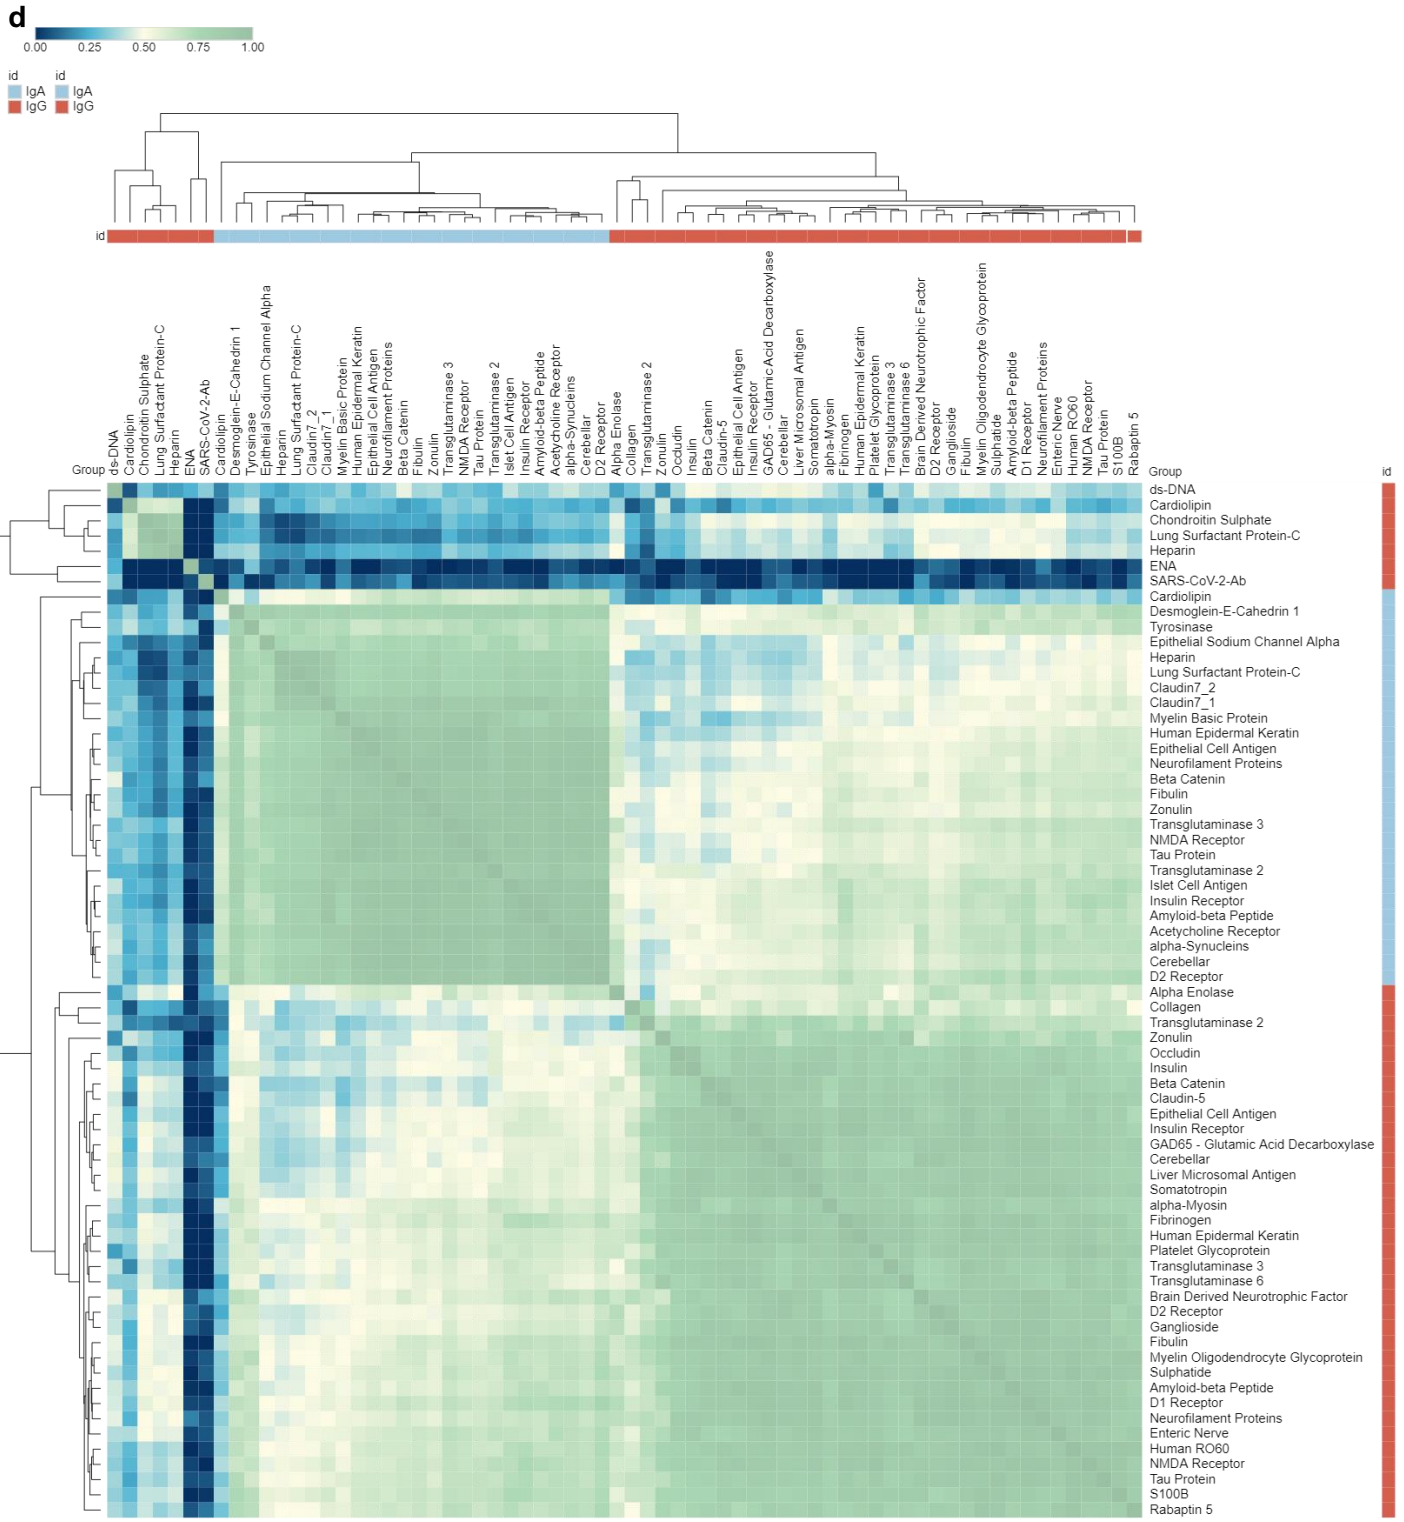

Severe COVID-19

e

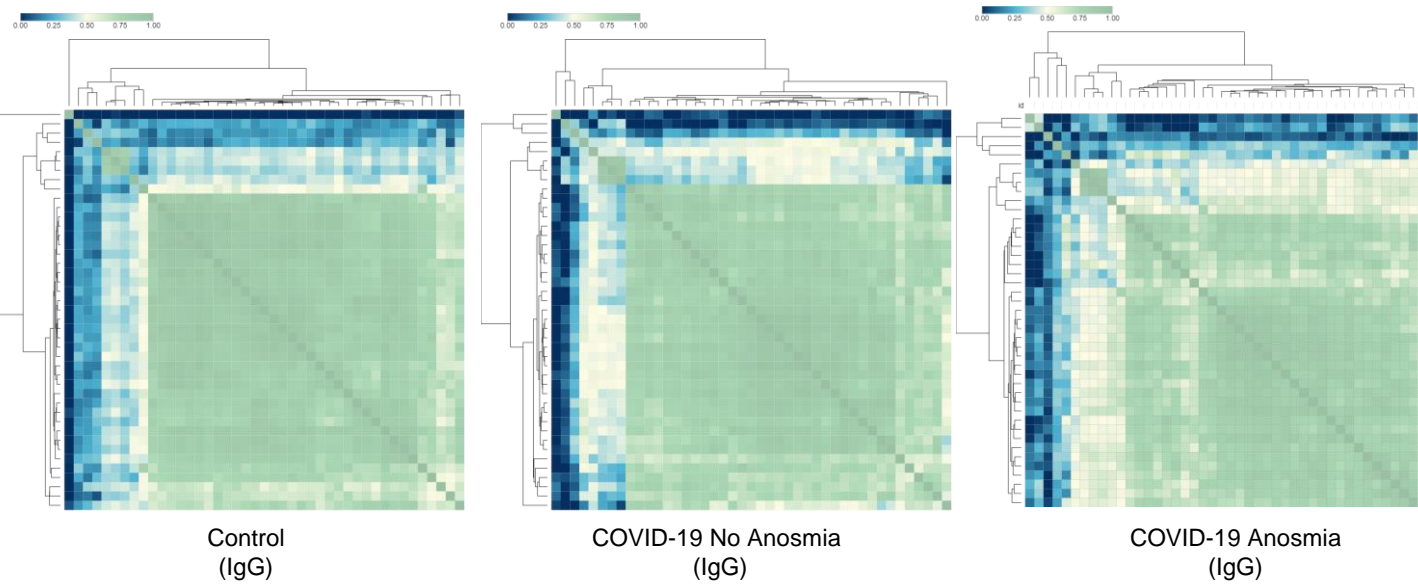

a

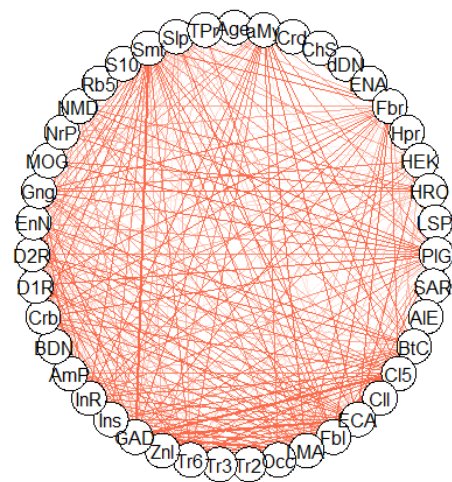

Mild Anosmia

Mild No Anosmia

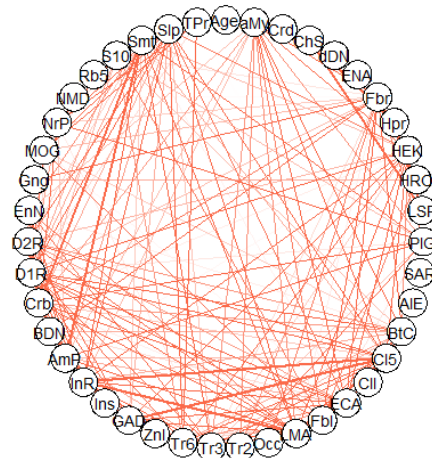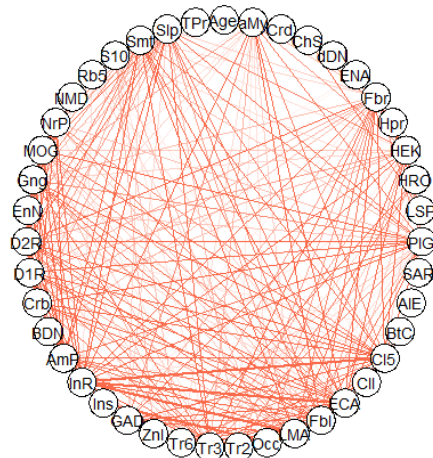

Moderate Anosmia

Moderate No Anosmia

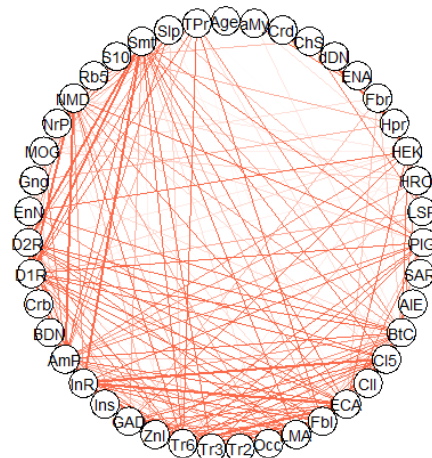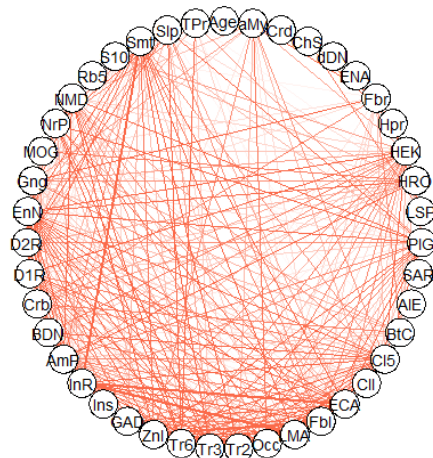

Severe Anosmia

Severe No Anosmia

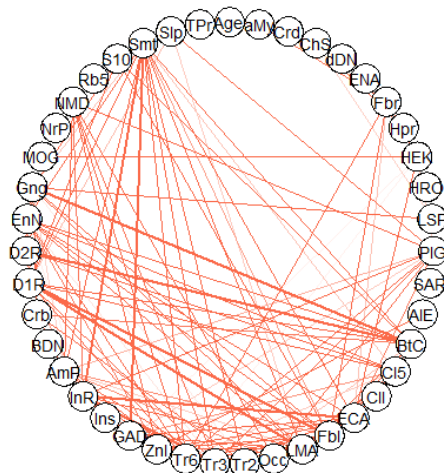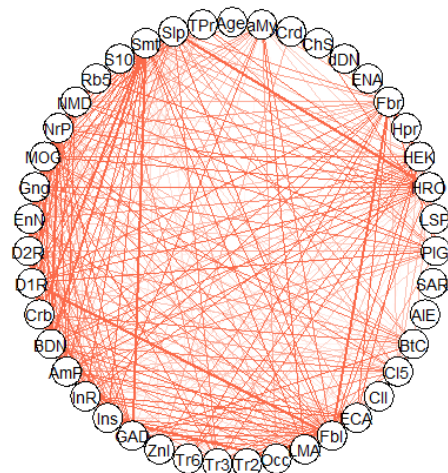

Control No Anosmia

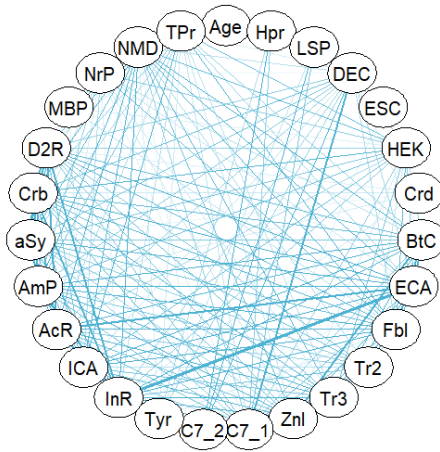

Mild Anosmia

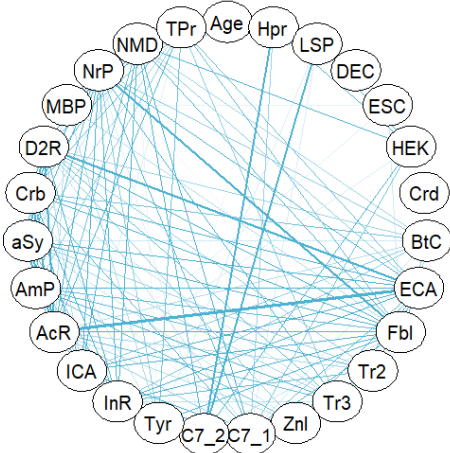

Mild No Anosmia

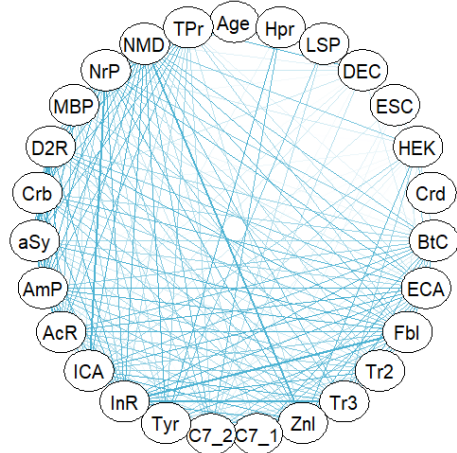

Moderate Anosmia

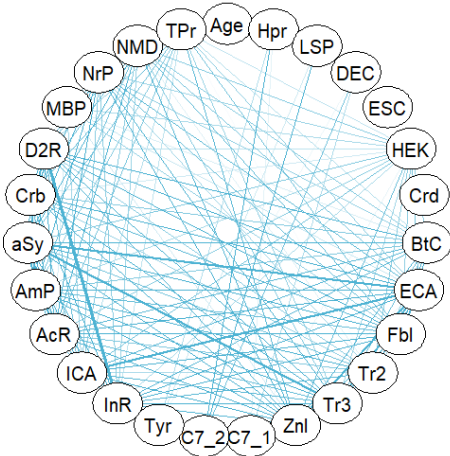

Moderate No Anosmia

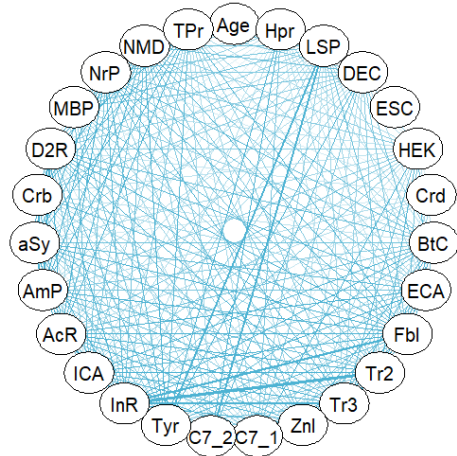

Severe Anosmia

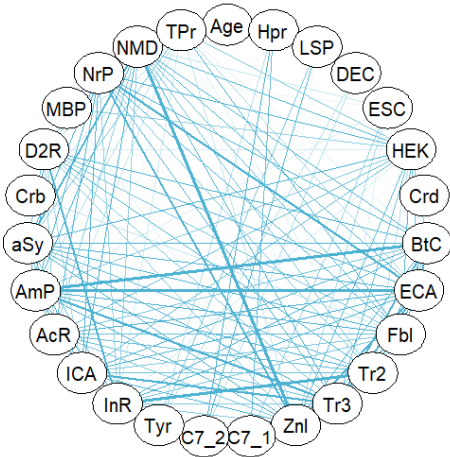

Severe No Anosmia

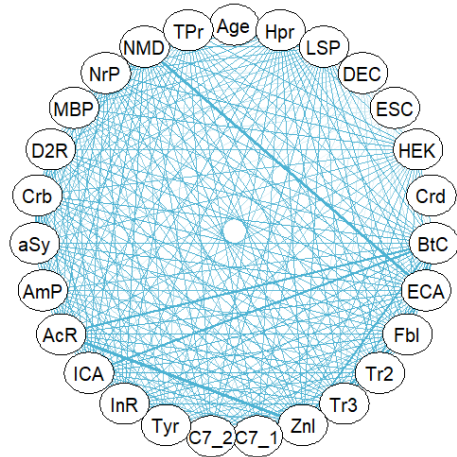

b

**a**

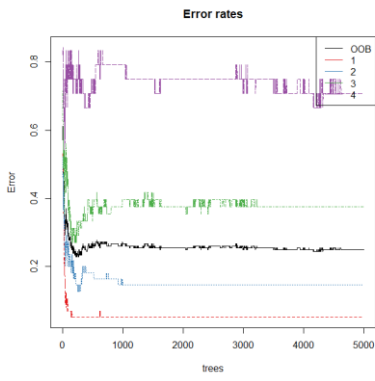

**b**

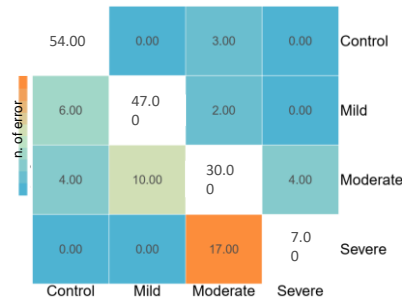

**c**

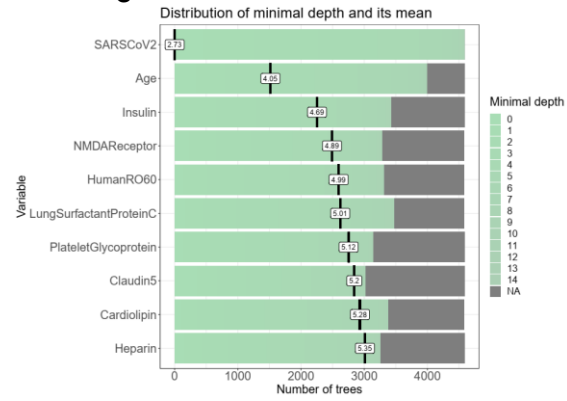

**d**

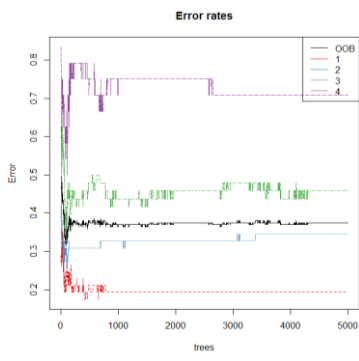

**e**

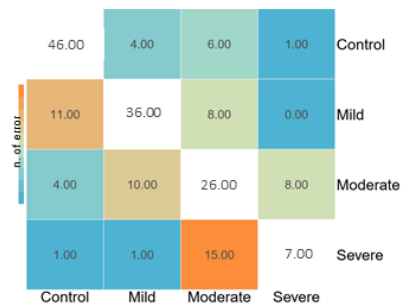

**f**

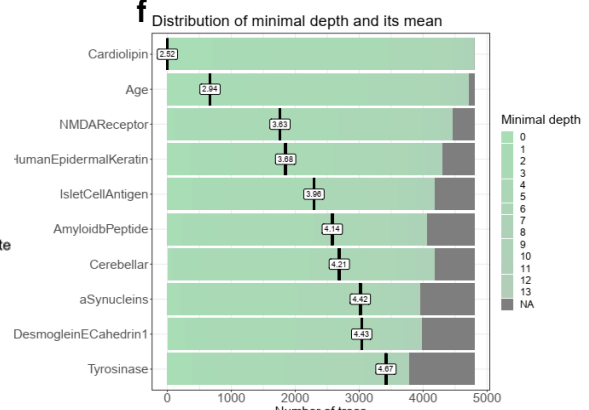

**g**

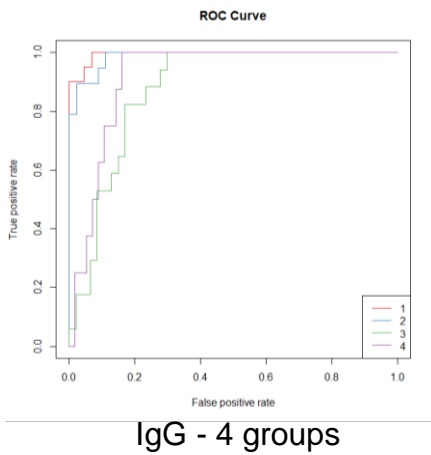

**h**

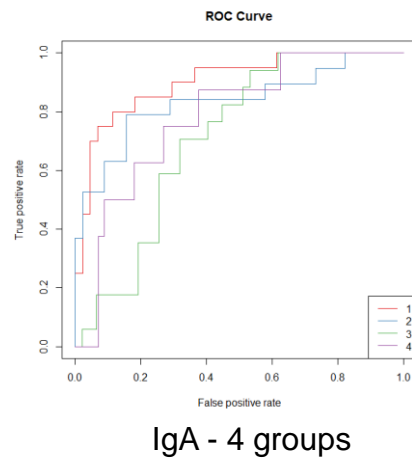

**i**

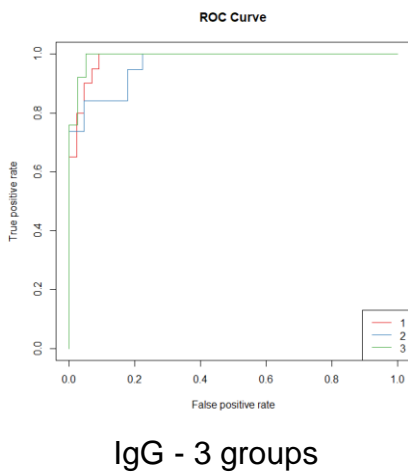

**j**

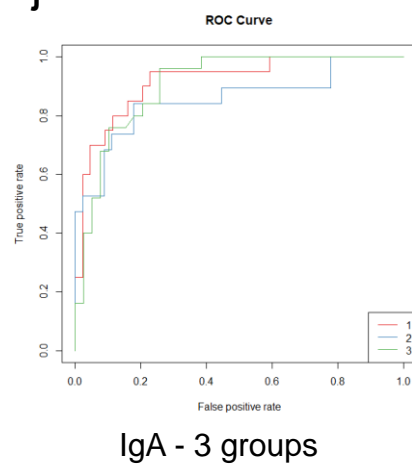

Group     Control-Young     Mild-Young     Moderate-Young     Severe-Young  
 Control-Elderly     Mild-Elderly     Moderate-Elderly     Severe-Elderly

a

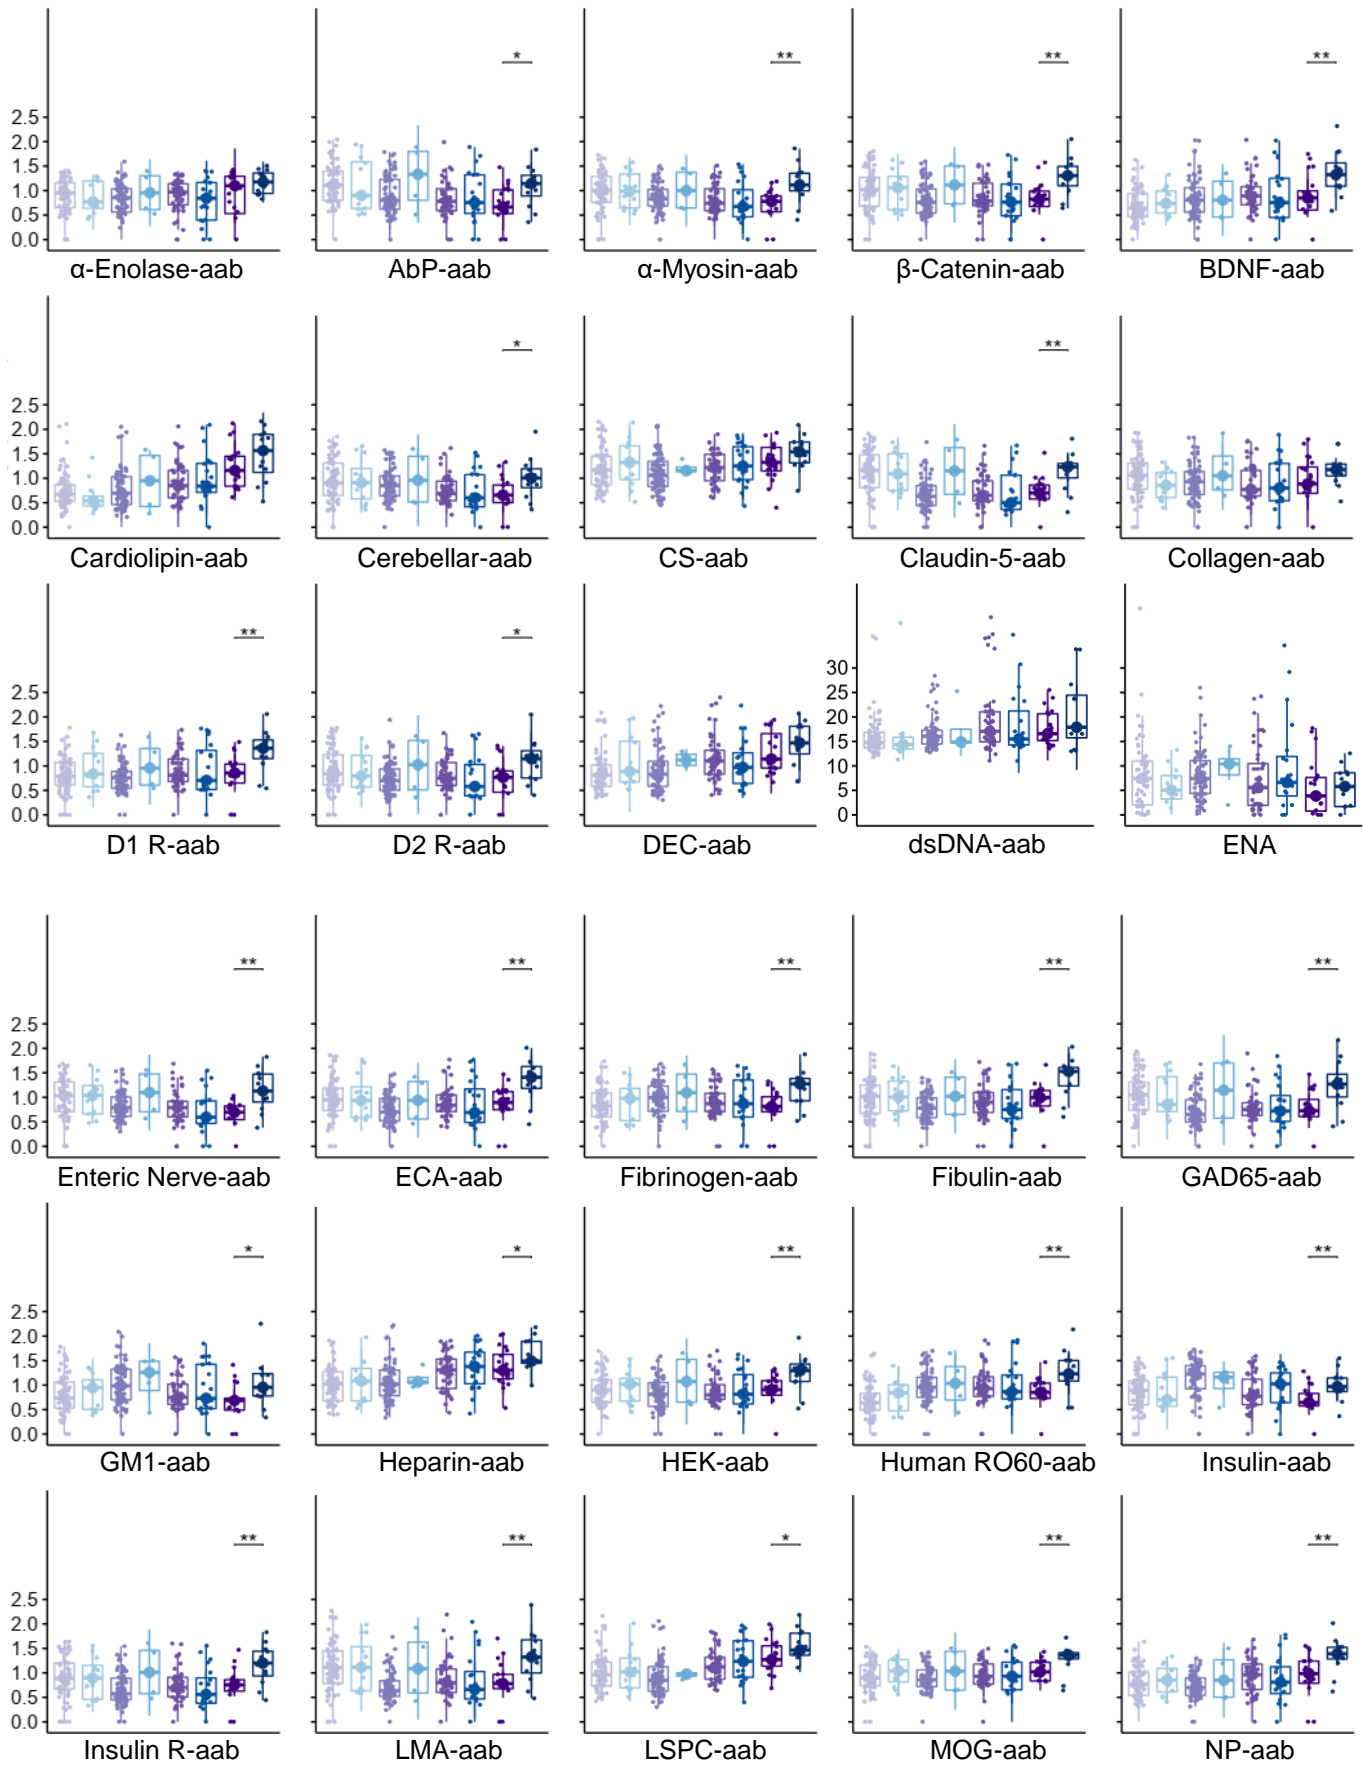

**a**

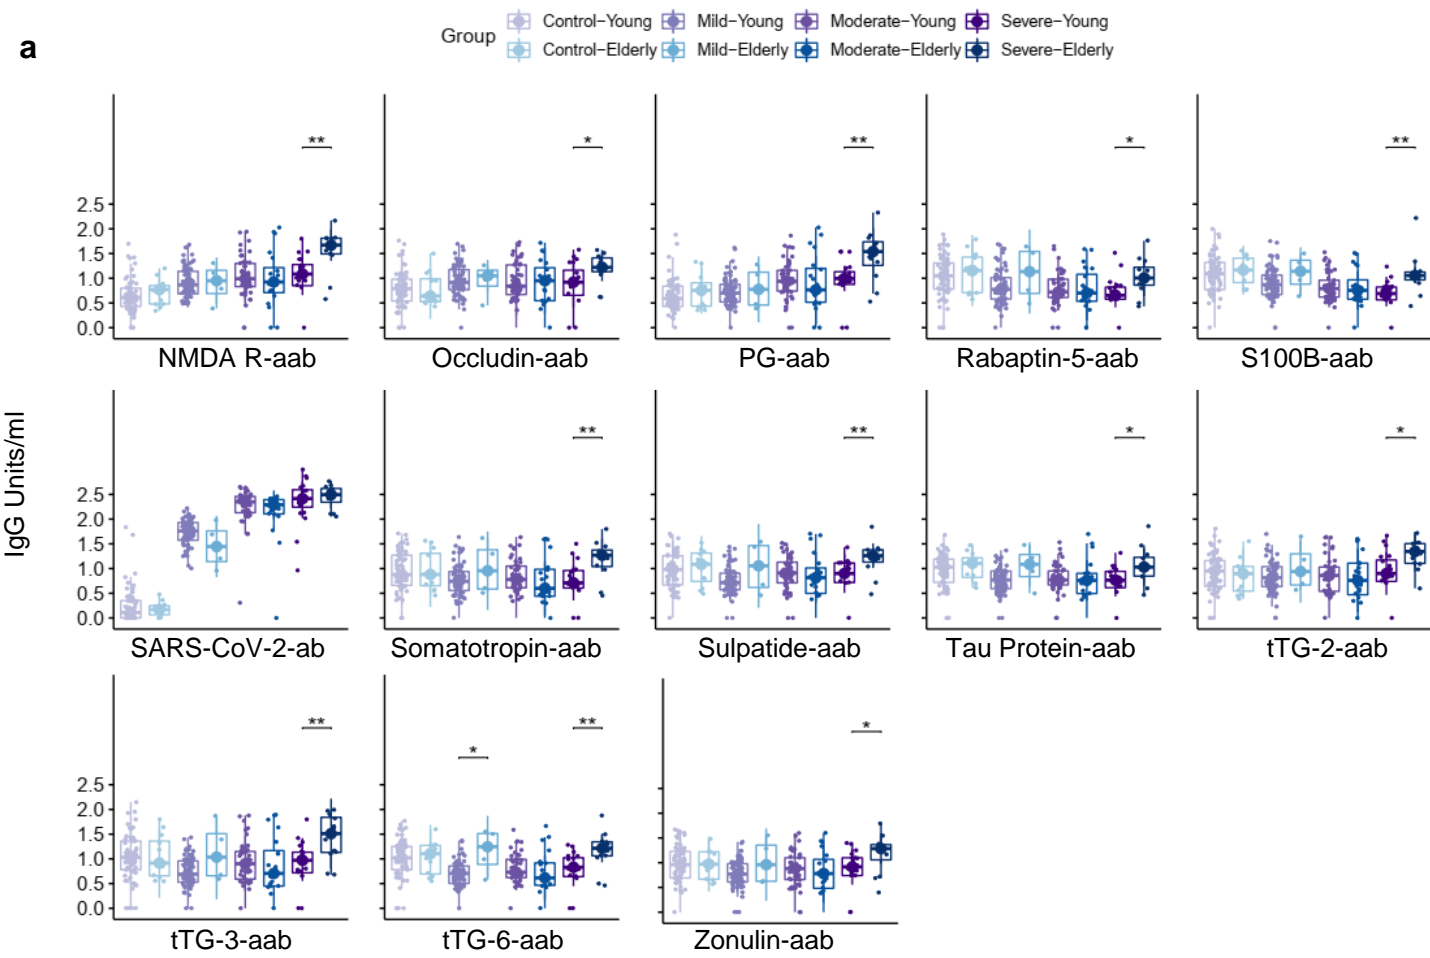

**b**

Group ■ Control-Young ■ Mild-Young ■ Moderate-Young ■ Severe-Young  
■ Control-Elderly ■ Mild-Elderly ■ Moderate-Elderly ■ Severe-Elderly

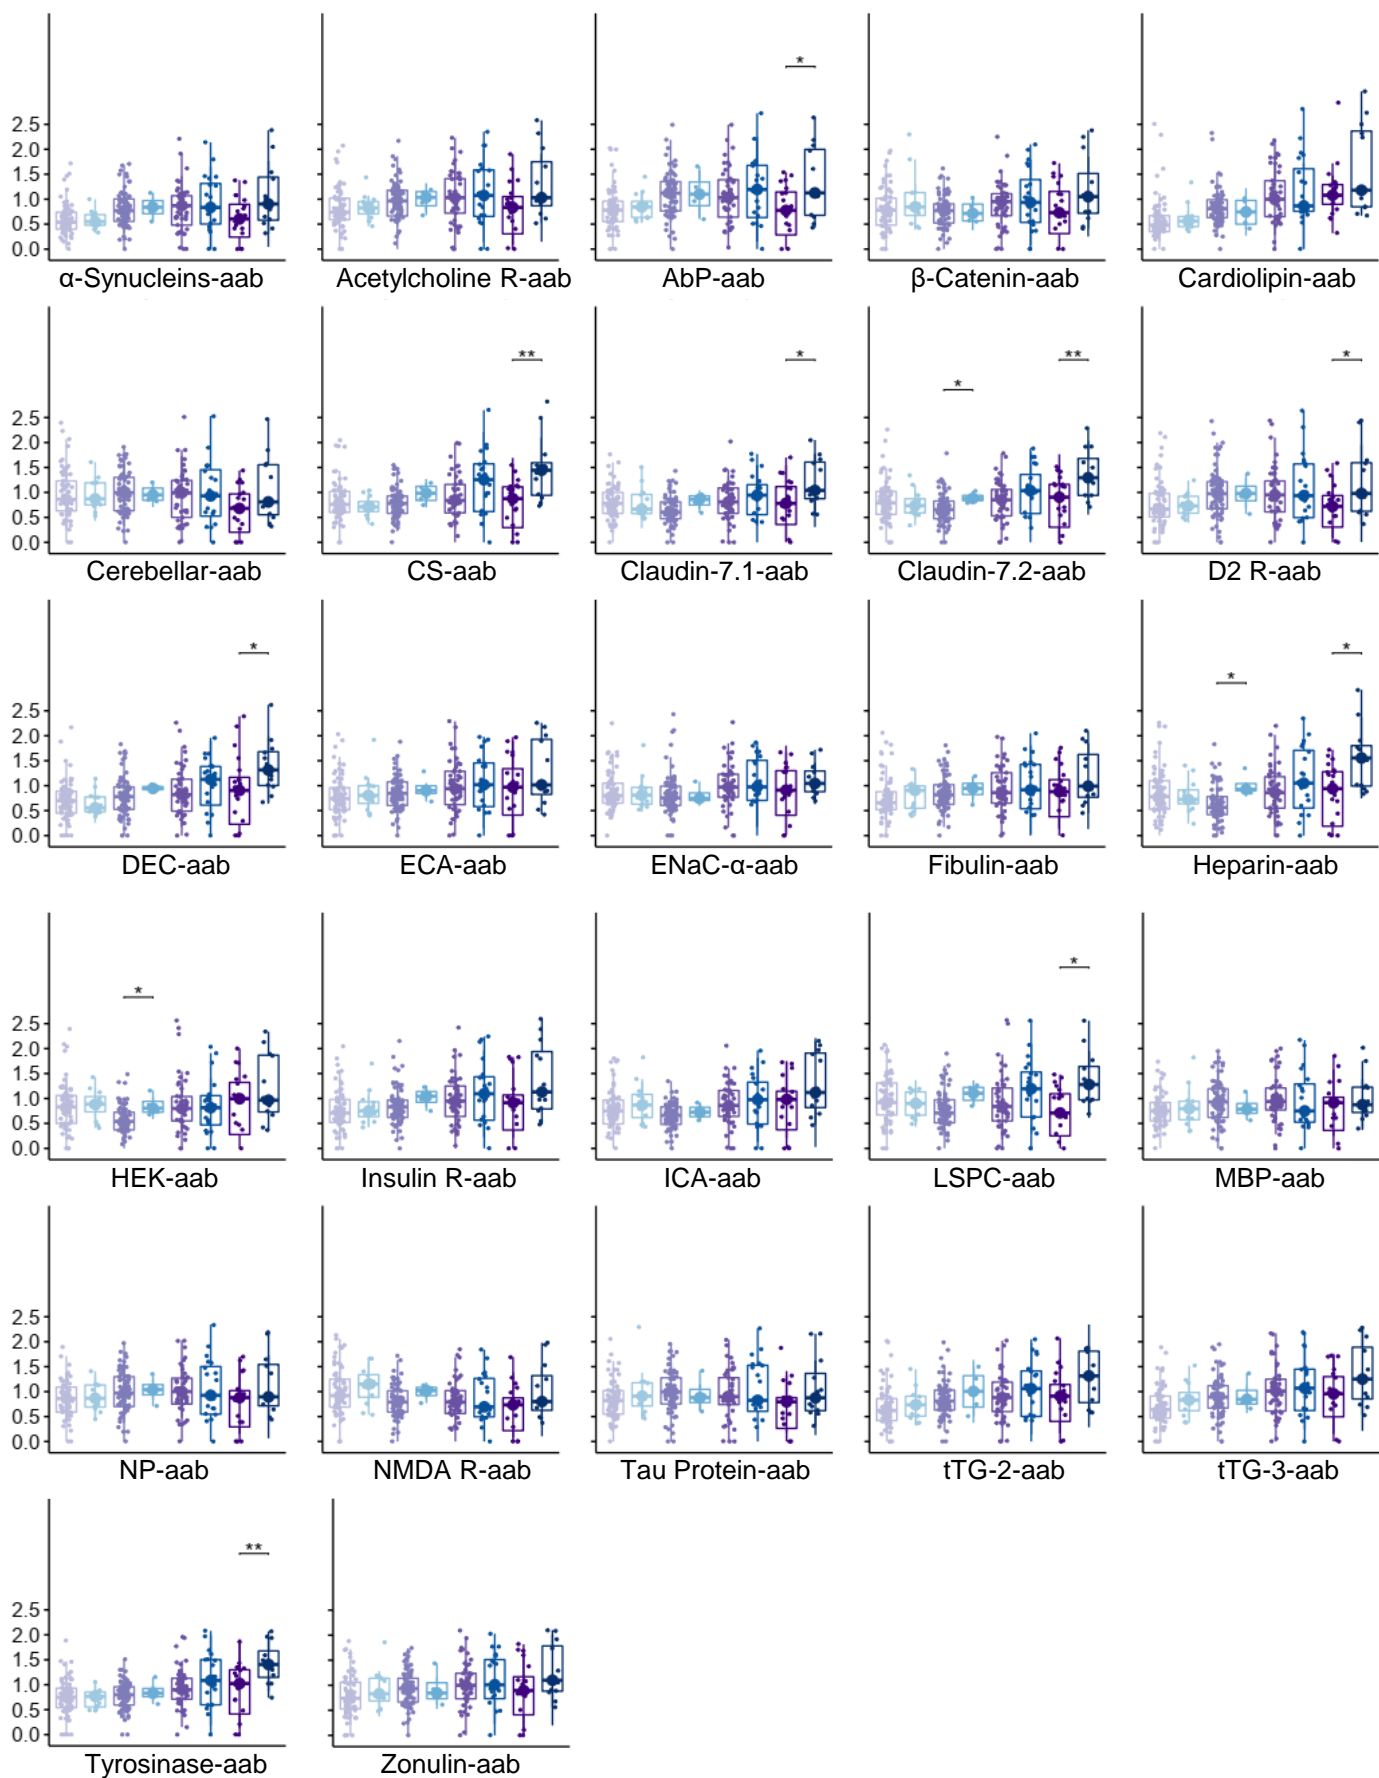



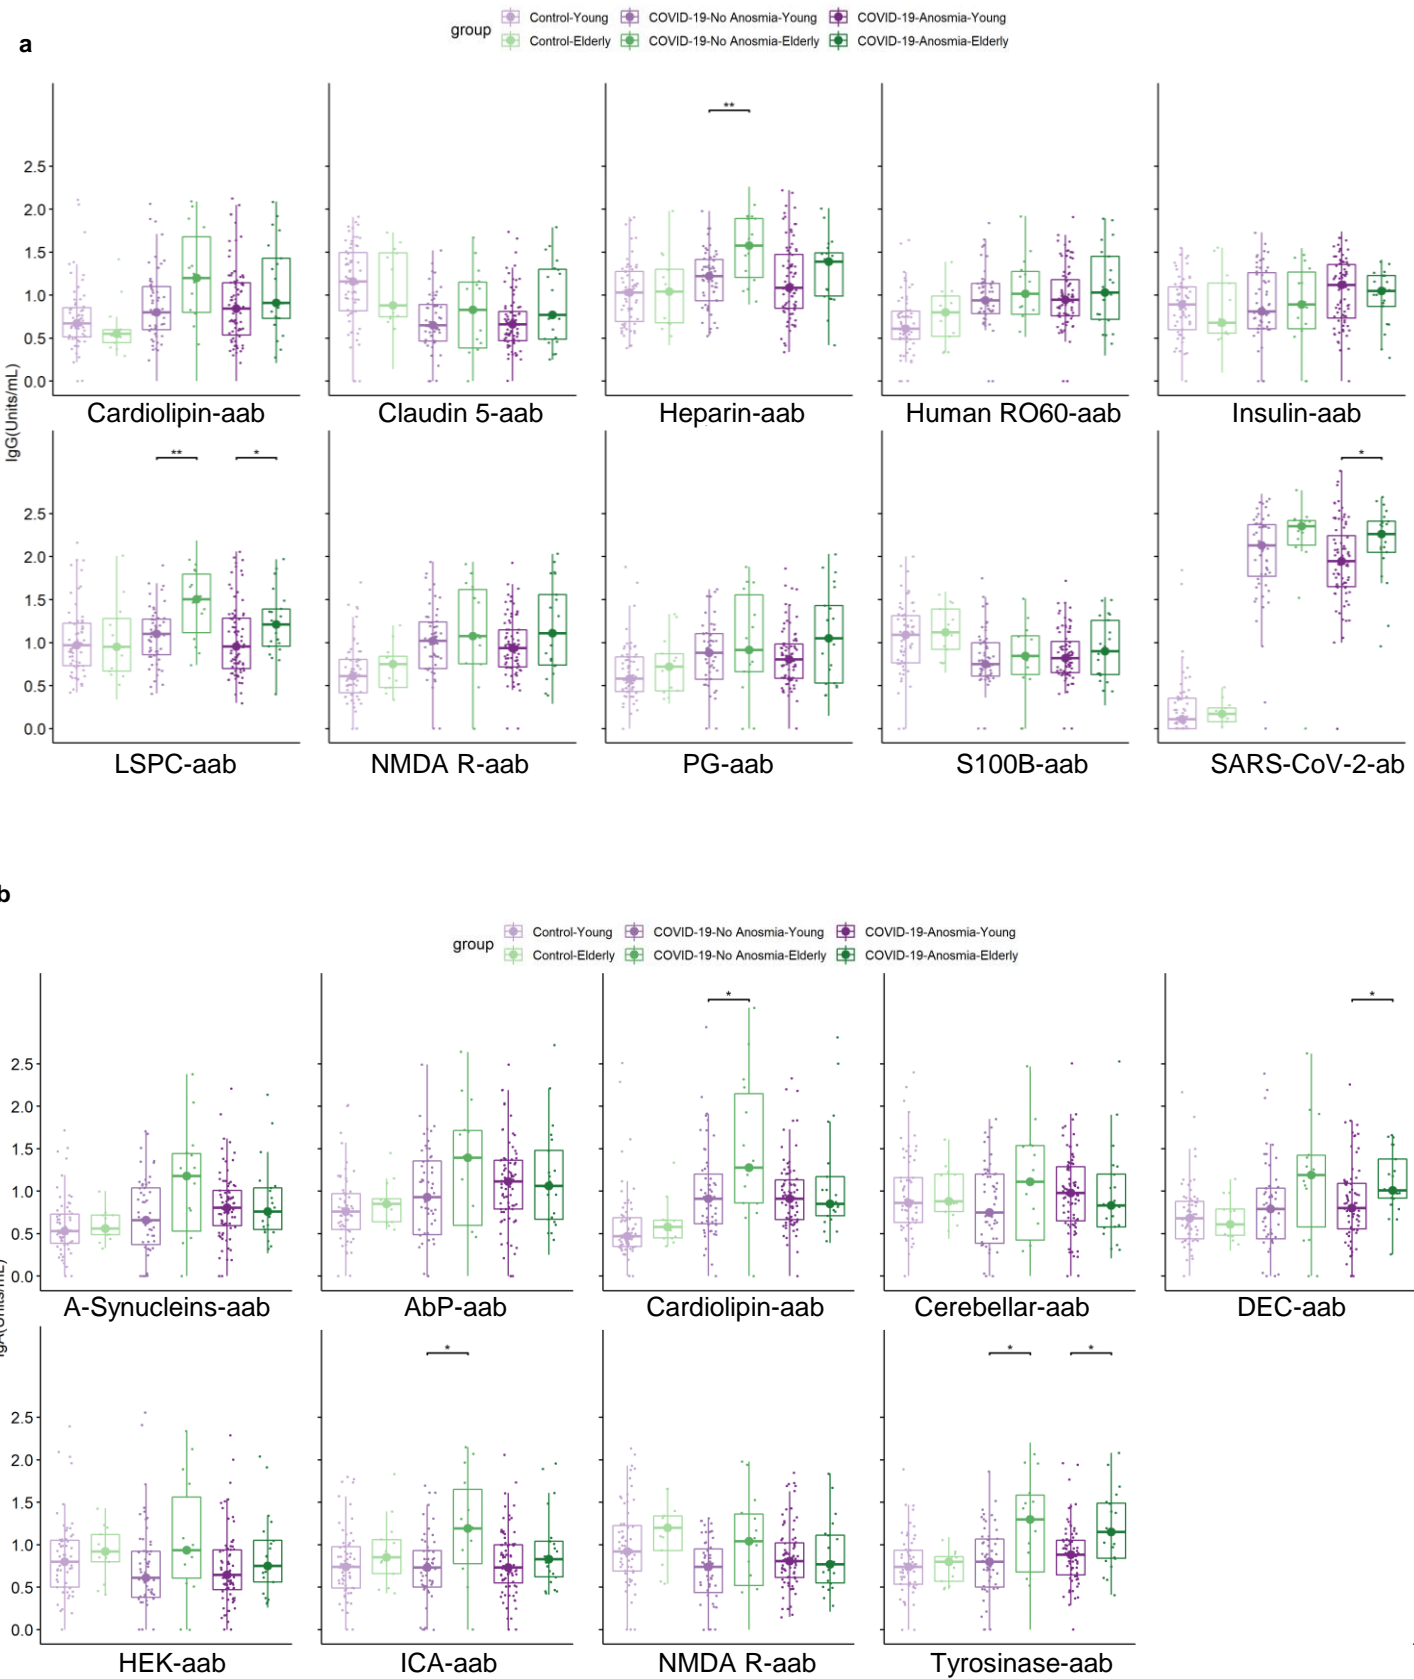

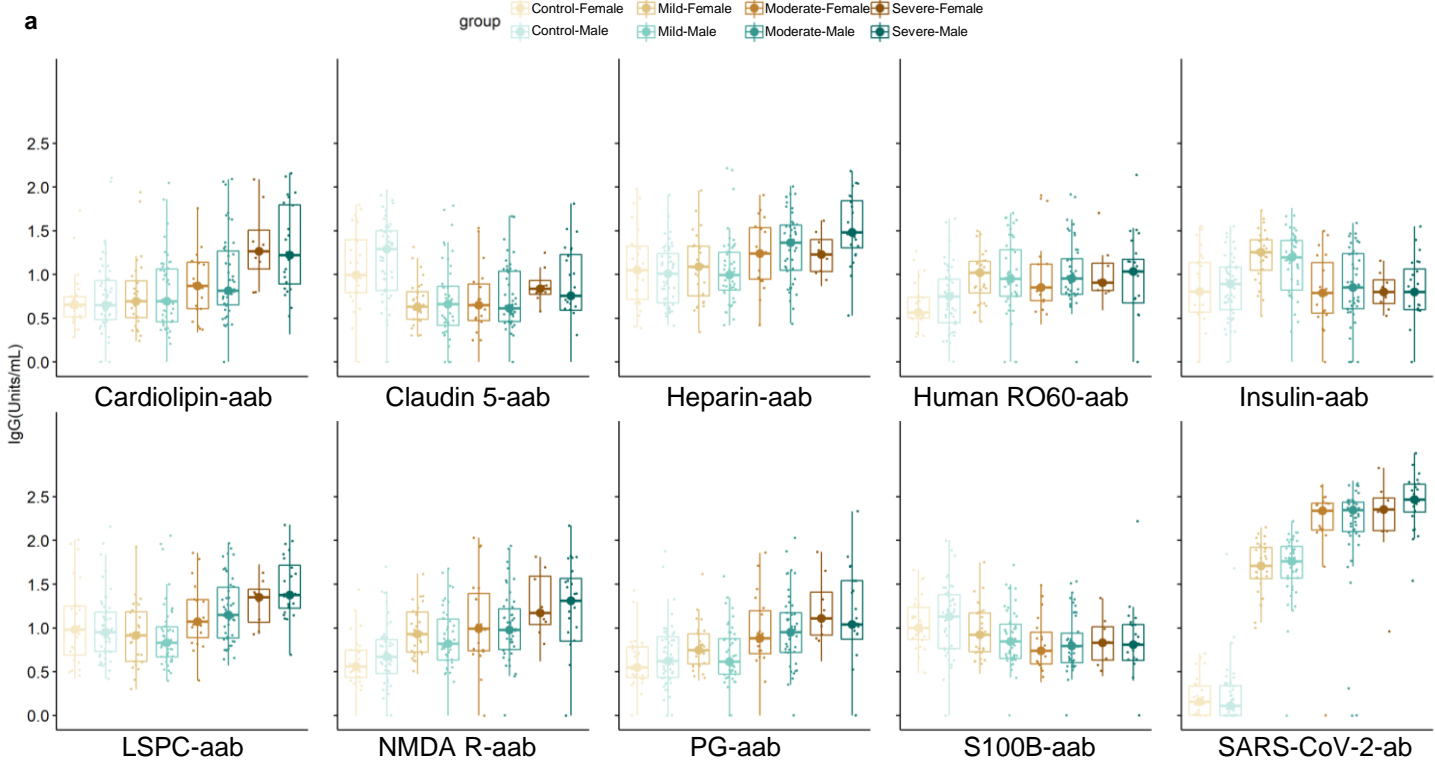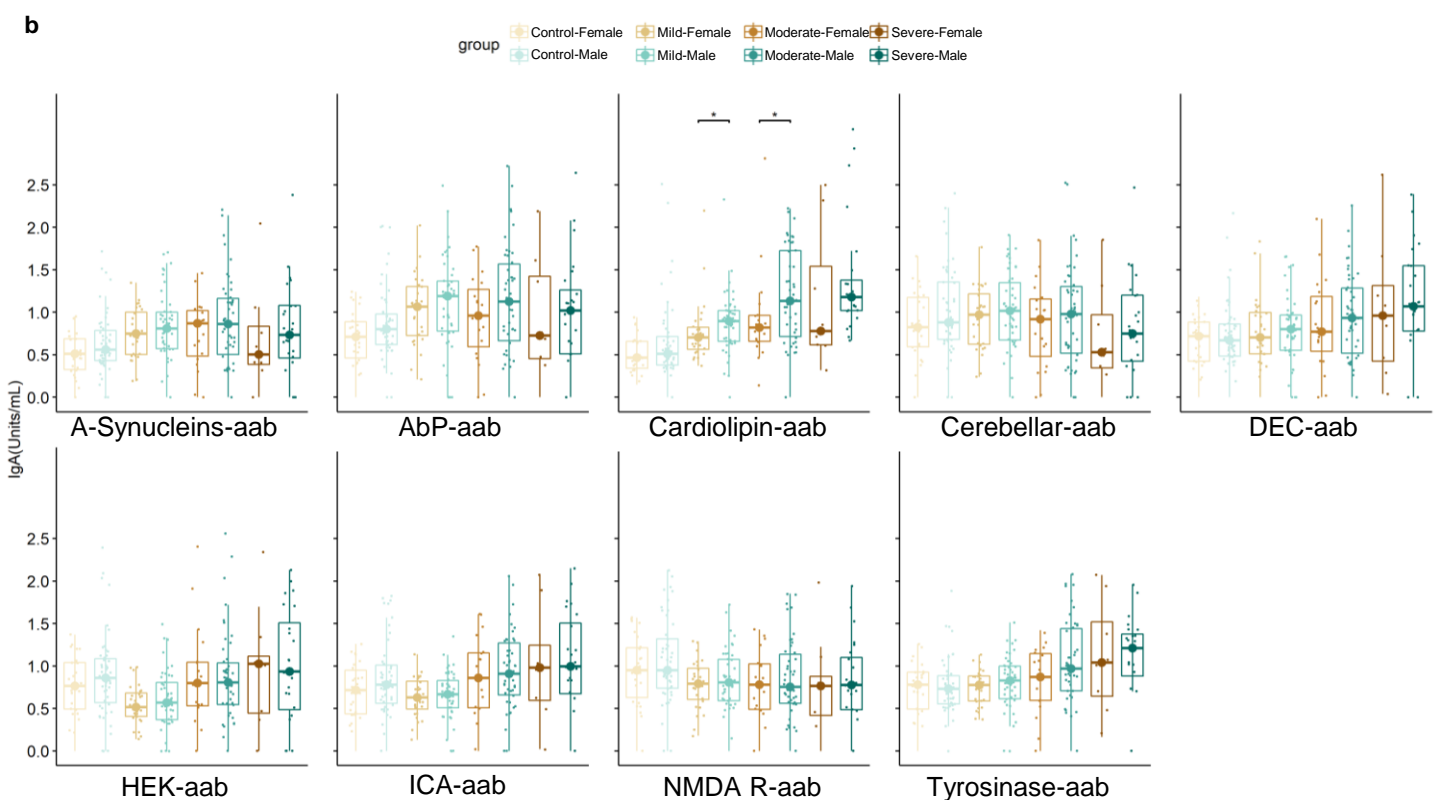

Supplement: Supplementary file [file media-2.pdf]
